# Supplementary material for: Identification of novel regulators required for early development of vein pattern in the cotyledons by single‐cell RNA‐sequencing
Source: PubMed Central journal article supplement — Plant J. 2022 Mar 16;110(1):7–22. doi: 10.1111/tpj.15719 (PMC9310732; doi:10.1111/tpj.15719), 2022-03-16
Supplement: TPJ-110-7-s005.pdf [file TPJ-110-7-s005.pdf]

## SUPPORTING INFORMATION

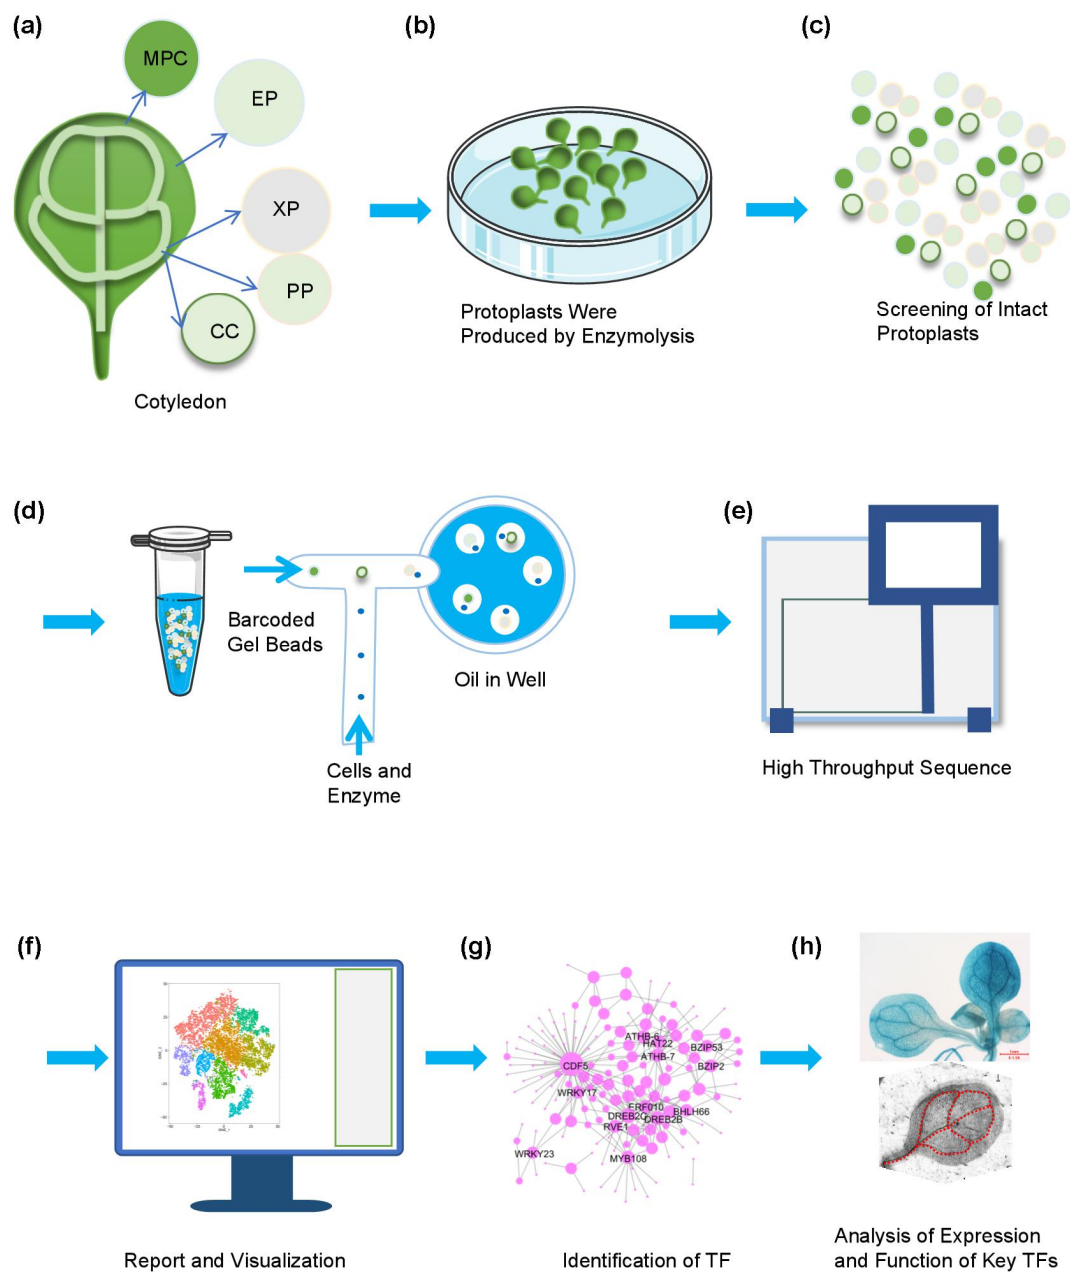

**Figure S1** The experimental flow chart used in this study.

(a) Model of cotyledons and major representative cell types. MPC: mesophyll cell, EP:epidermis, PP: phloem parenchyma, XP: xylem parenchyma, CC: companion cell. (b) Protoplasts were prepared by enzymatic hydrolysis. (c) The protoplasts were screened by cell strainer. (d) Generation of single cell sequencing library by barcode technique. (e) Sequencing of the single cell library produced by second generation

sequencing system. **(f)** Analysis of the raw scRNA-seq data and visualization of the results. **(g)** Construction of transcriptional regulatory network of differentially expressed genes in specific cell types. **(h)** Analysis of the expression and physiological function of key transcription factors identified.

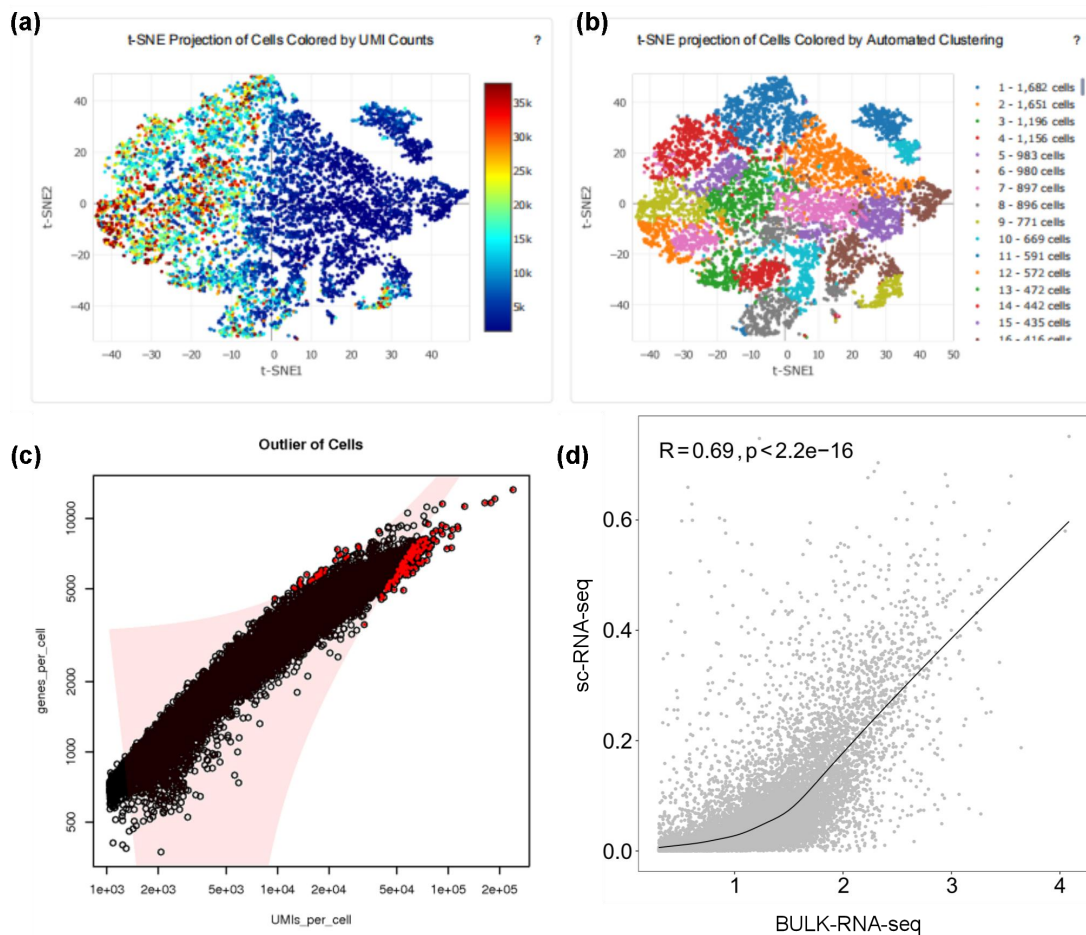

**Figure S2** Quality control analysis of the raw data of scRNA-seq.

**(a)** Projection of cells colored by UMI (unique molecular identifier) counts onto a t-SNE plot. **(b)** Projection of cells colored by automated clustering onto a t-SNE plot. **(c)** Analysis of outlier cells by calculating the ratio of UMI/gene number. **(d)** Correlation analysis of gene expression in cotyledons, as inferred from scRNA-seq profiling of cotyledons (gene expression from all the cells was averaged) ( $r = 0.69$ ,  $p < 2.2 \times 10^{-16}$ , Pearson; fit line by LOESS).

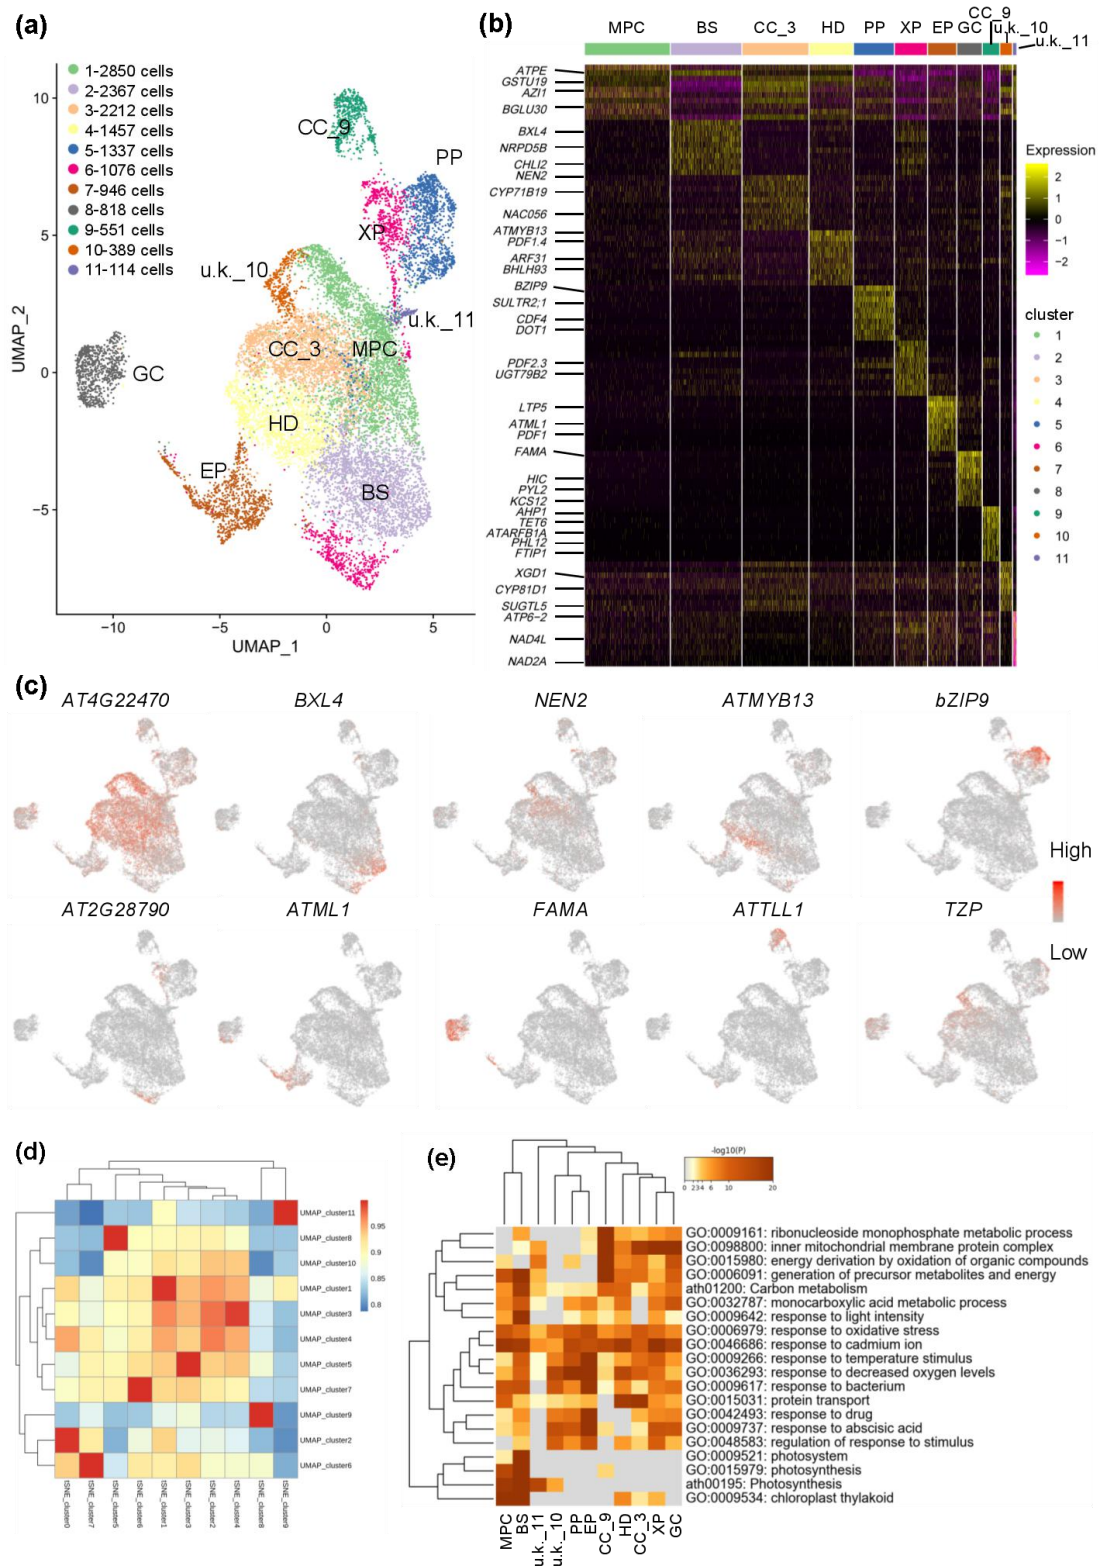

**Figure S3** UMAP analysis of the cells.

**(a)** Visualization of the cell clusters by Uniform Manifold Approximation and Projection (UMAP) algorithm. Cell clusters identified by tSNE are marked on the UMAP plot. BS: bundle sheath; MPC: mesophyll cell; PP: phloem parenchyma; HD:

hydathode; CC: companion cell; GC: guard cell; EP: epidermis; XP: xylem parenchyma. **(b)** Expression of identified marker genes by UMAP is shown as a heatmap. **(c)** Feature plots show the expression of representative marker genes in each cell type. **(d)** Pearson correlation analysis between tSNE and UMAP was performed with the corresponding cell clusters. **(e)** GO enrichment of DEGs in all of cell clusters.

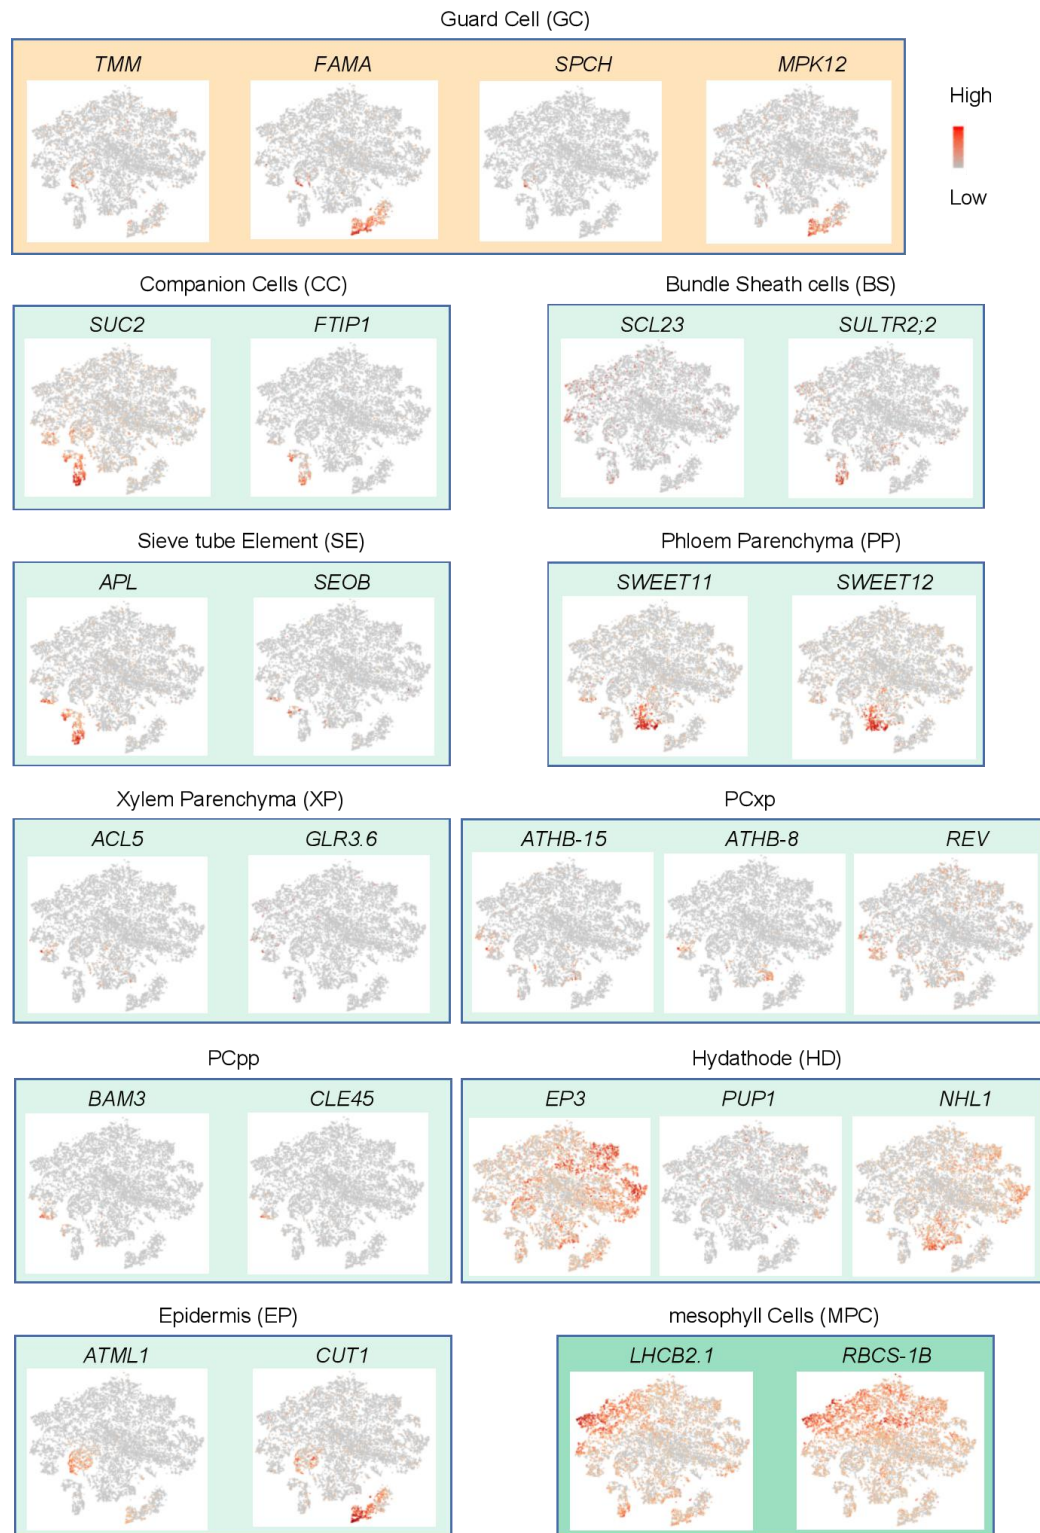

**Figure S4** Analysis of the expression of known marker genes of different kinds of cell types on tSNE plot.

Feature plots of expression distribution for selected marker genes. Expression levels for each cell are color-coded and overlaid onto the tSNE plot.



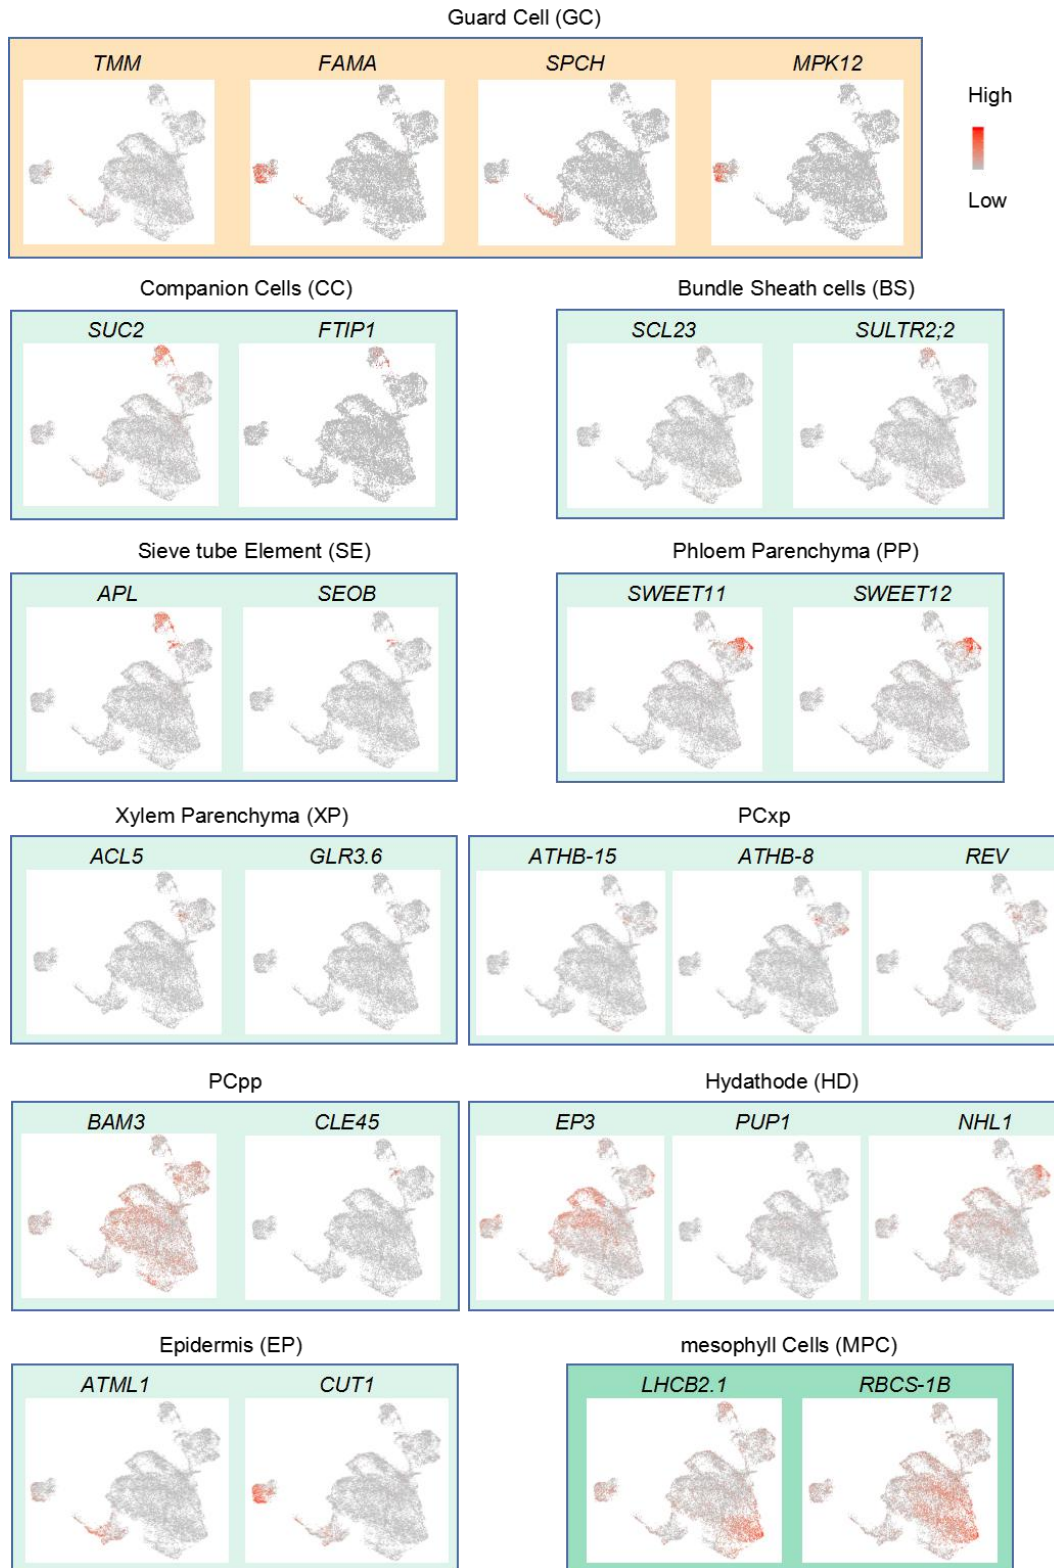

**Figure S5** Analysis of the expression of known marker genes of different kinds of cell types on UMAP plot.

Feature plots of expression distribution for selected marker genes. Expression levels for each cell are color-coded and overlaid onto the UMAP plot.

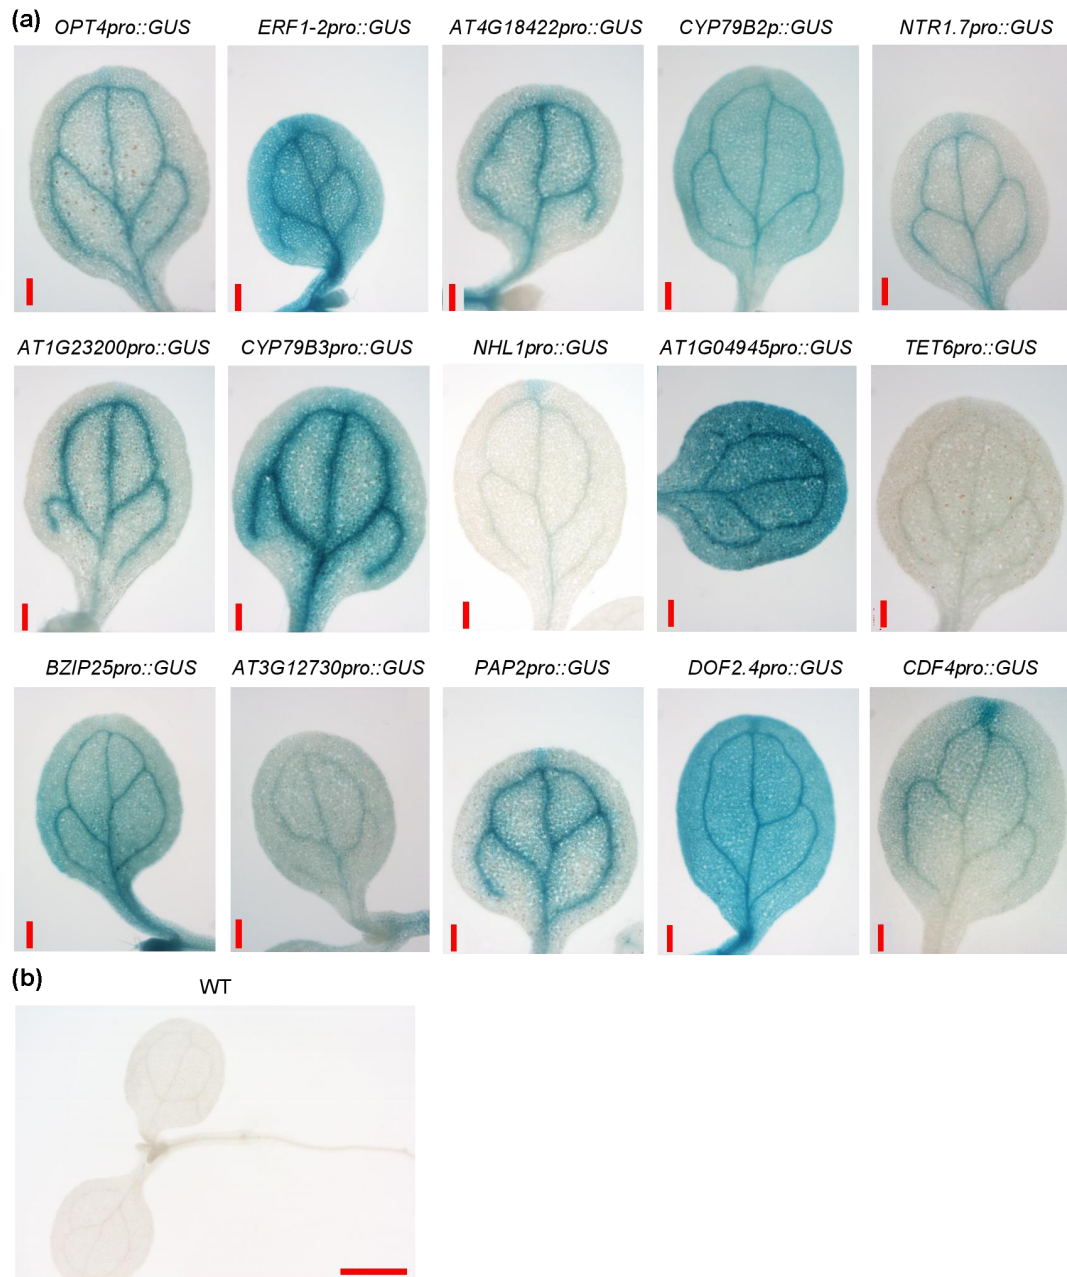

**Figure S6** Analysis of the expression of representative vein marker genes.

To detect the expression patterns of representative vein marker genes, we generated transgenic plants expressing the GUS reporter driven by the promoter of these representative vein marker genes, respectively. **(a)** The GUS signals of representative vein marker genes were detected in the cotyledons. Scale bar: 200  $\mu$ m. **(b)** Detection of the GUS activity in 3-day-old seedling of wild type (WT). Scale bar: 1000  $\mu$ m.

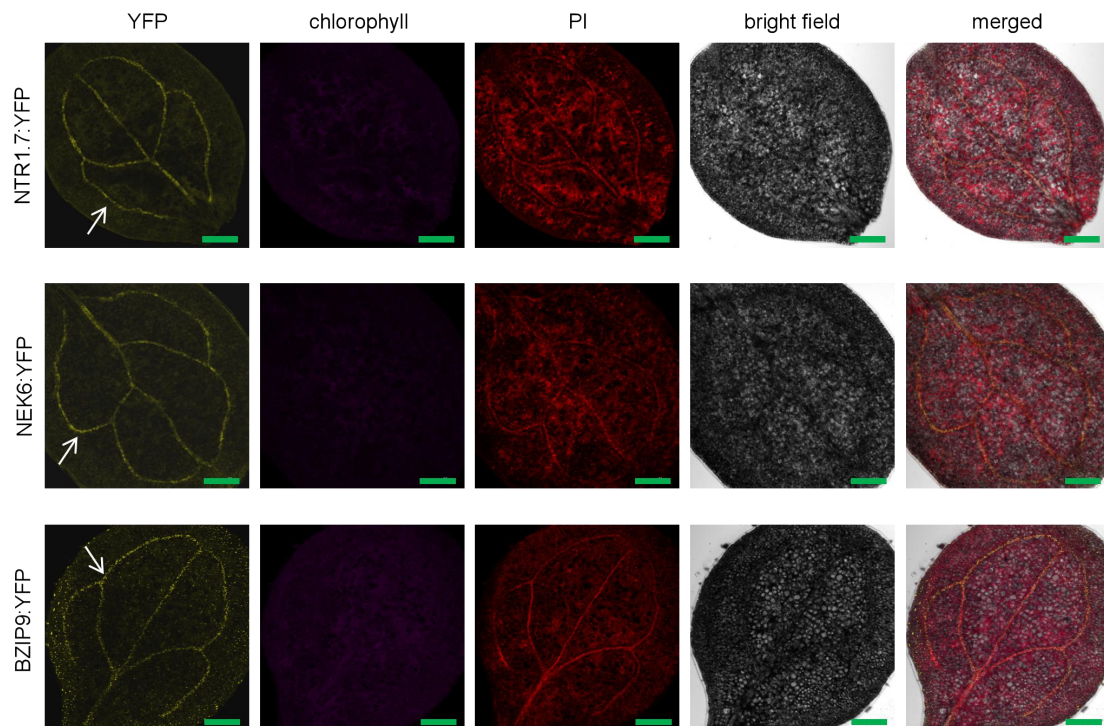

**Figure S7** NTR1.7, NEK6, and BZIP9 were expressed in vein.

The expression of YFP of NTR1.7:YFP, NEK6:YFP and BZIP9:YFP can be detected in veins of 3-day-old cotyledons. Scale bar:200  $\mu$ m. White arrow showing the vein in cotyledons. PI: Propidium. YFP: Yellow Fluorescent Protein.



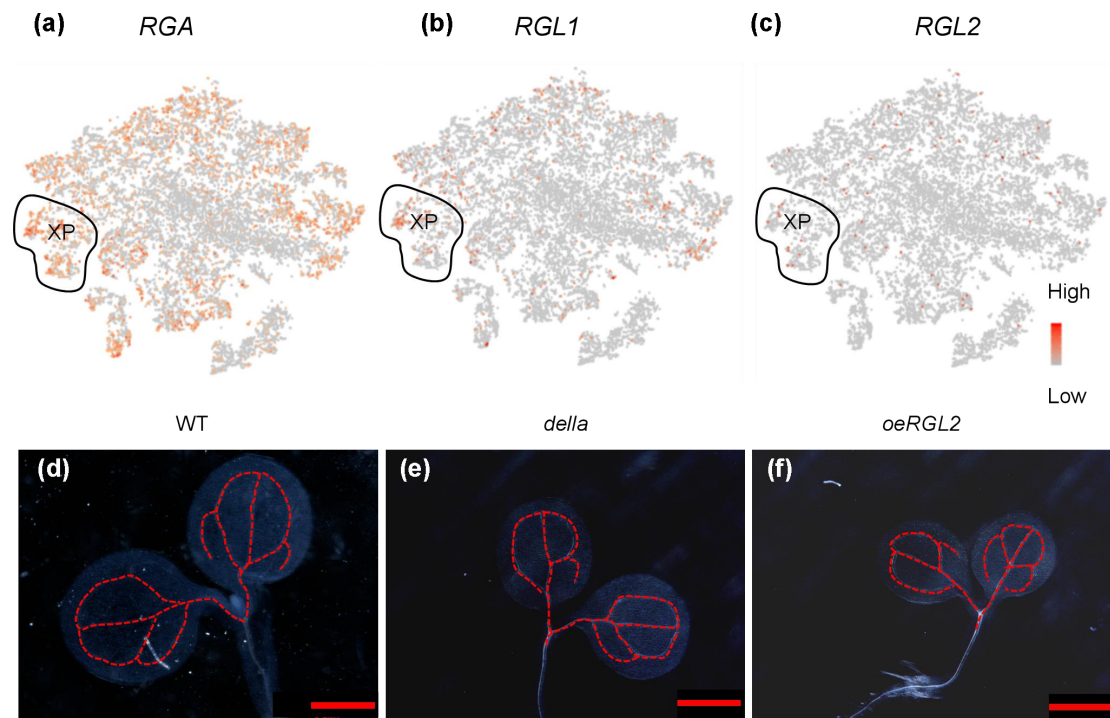

**Figure S8** DELLA proteins are required for the regulation of the patterns of vascular systems in cotyledons.

(a) - (c) Feature plots of the expression of *RGA*, *RGL1* and *RGL2*. (d)-(f) Detection of the developmental patterns of vascular system in cotyledons of 3-day-old seedlings of wild-type (WT) seedlings, *della* quintuple mutant (*gai-t6; rga-t2; rgl1-1; rgl2-1; rgl3-1*), and *oeRGL2*, respectively. Scale bar: 500  $\mu\text{m}$ .

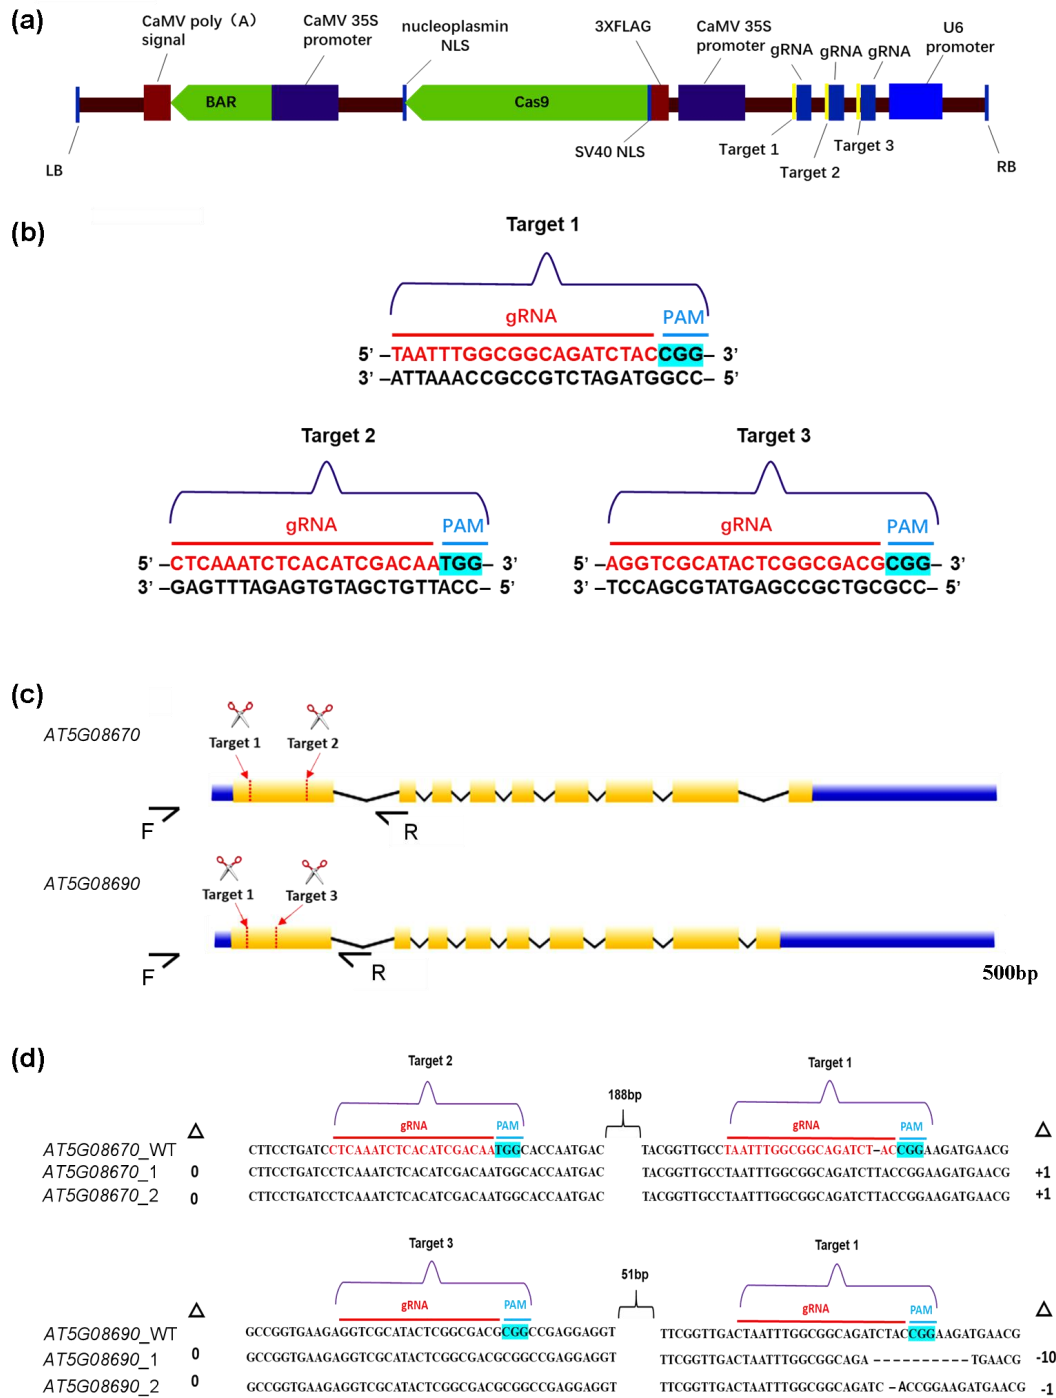

**Figure S9** Vector information of gRNA CRISPR/Cas9 and double mutant verification.

(a) Crispr/cas9 vector for *Arabidopsis* transformation. The expression of *BAR* (anti herbicide gene that is a screening marker, and CAS9 protein was driven by 35S promoter, and the expression of three sgRNAs was driven by *Arabidopsis* U6 promoter (pU6). (b) sgRNA sequence, red letters are gRNA sequence, blue letters are protopackage adjacent motif (PAM) sequence. (c) The shear sites and identification

primers of *AT5G08670* and *AT5G08690* indicate that the lines represent intron region, blue represents UTR region, yellow represents exon region. **(d)** The results of target 1 and target 2 editing are identified by sequencing. The results of editing two T1 plants are shown.  $\Delta$  represents mutation results: -, deleted nucleotide; +, inserted nucleotide; 0, no deletion or insertion.

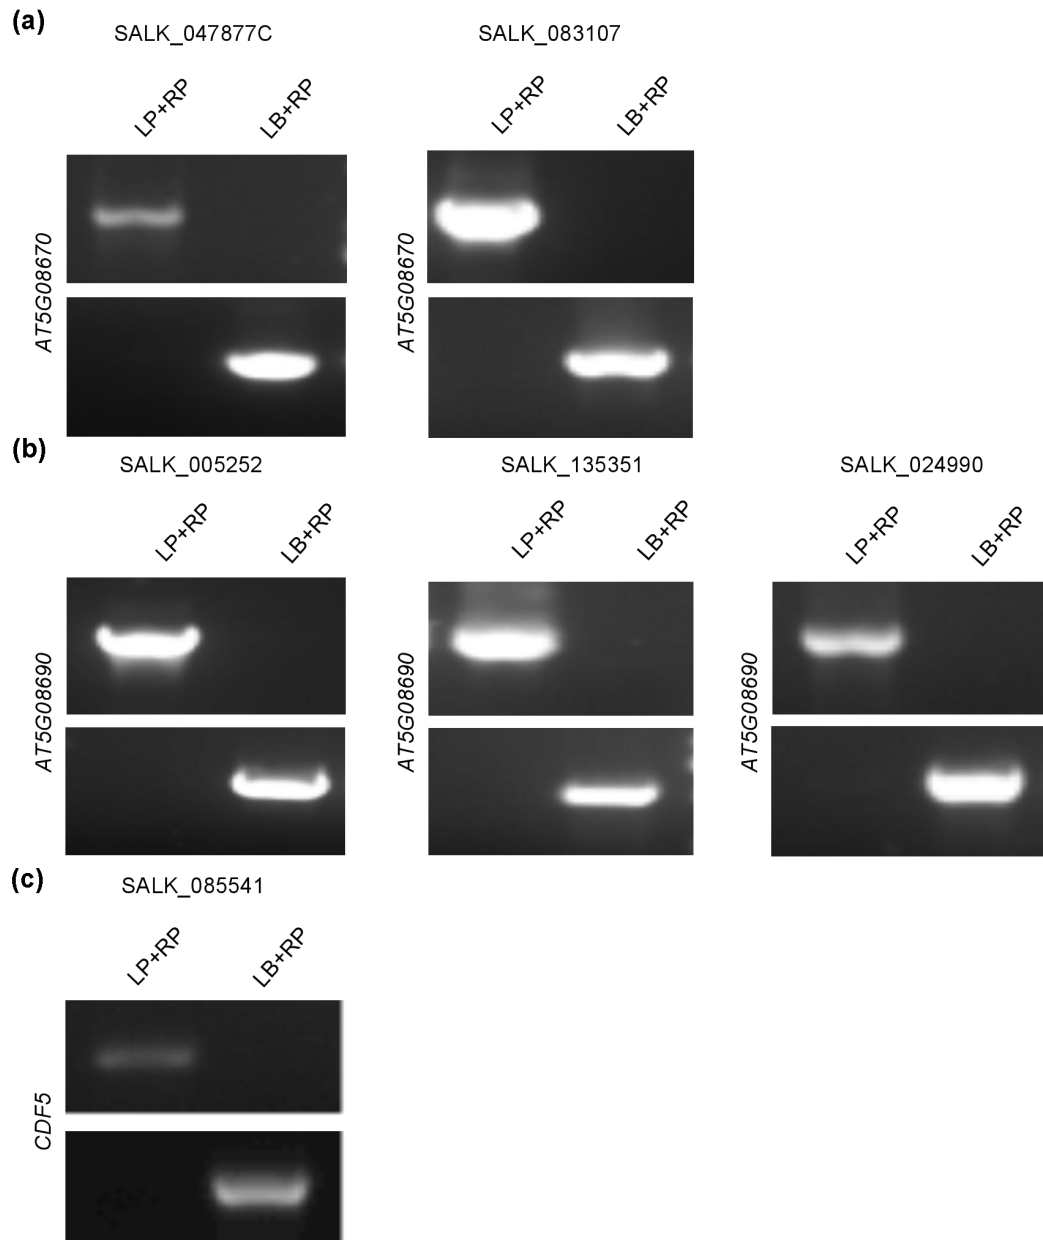

**Figure S10** Verification of the T-DNA insertion of mutants.

DNA was extracted from the mutants and WT; the location of the T-DNA insertion in each mutant was verified by PCR with the corresponding primers. **(a)** Identification of

the homozygotes of *AT5G08670* mutants. (b) Identification of the homozygotes of *AT5G08690* mutants. (c) Identification of the homozygotes of *CDF5* mutant.

**Table S6** List of mutant lines used in this study

| Gene name        | Accession number | Mutant line  |
|------------------|------------------|--------------|
| <i>AT5G08670</i> |                  | SALK_047877C |
|                  |                  | SALK_083107  |
| <i>AT5G08690</i> |                  | SALK_005252  |
|                  |                  | SALK_135351  |
|                  |                  | SALK_024990  |
| <i>CDF5</i>      | AT2G34140        | SALK_085541C |

**Table S7** List of oligonucleotides used in this study

| Gene                                          | Name       | Sequence (5' - 3')                  |
|-----------------------------------------------|------------|-------------------------------------|
| <b>Plant transformant (cloned in PBGWFS7)</b> |            |                                     |
| <i>ERF1-2</i>                                 | ERF1-2s    | AAAAAGCAGGCTTCCAAGAAATACAATAGGTACT  |
|                                               | ERF1-2a    | AGAAAGCTGGGTGGTTCACAATATTCAGAGATC   |
| <i>AT1G04945</i>                              | AT1G04945s | AAAAAGCAGGCTTC TTGAATAGTATTACAATCTA |
|                                               | AT1G04945a | AGAAAGCTGGGTG CCTTACCAACTAAAATGCCT  |
| <i>CDF4</i>                                   | CDF4s      | AAAAAGCAGGCTTCAAATTCATACTACAATTTA   |
|                                               | CDF4a      | AGAAAGCTGGGTGGAAAACGTGCAGAGAATGGA   |
| <i>DOF2.4</i>                                 | DOF2.4s    | AAAAAGCAGGCTTCCGTTCTCGAGTTTTGCATT   |
|                                               | DOF2.4a    | AGAAAGCTGGGTGGGTATTCTCTTTTGATTTT    |
| <i>NHL1</i>                                   | NHL1s      | AAAAAGCAGGCTTCTGCTTTTAAAACTTGTTAA   |



|                                               |                   |                                     |
|-----------------------------------------------|-------------------|-------------------------------------|
|                                               | NHL1a             | AGAAAGCTGGGTGGGTGGTTGTTTTTTTCTTT    |
| <i>TET6</i>                                   | TET6s             | AAAAAGCAGGCTTCGTCAAACGACTATTCGTTGC  |
|                                               | TET6a             | AGAAAGCTGGGTGAGTAGTAATGTTATCAAGAA   |
| <i>BZIP25</i>                                 | BZIP25s           | AAAAAGCAGGCTTCCATTCGCGGCGAGGATGATA  |
|                                               | BZIP25a           | AGAAAGCTGGGTGCGCTTACCCAATCGCCTCAA   |
| <i>PAP2</i>                                   | PAP2s             | AAAAAGCAGGCTTCAGTATAATTAACCCTAGAG   |
|                                               | PAP2a             | AGAAAGCTGGGTGTTTTTTTCAAATATAATTGTG  |
| <i>CYP79B3</i>                                | <i>CYP79B3s</i>   | AAAAAGCAGGCTTCCCTCTGACGAAGAATTA AAA |
|                                               | <i>CYP79B3a</i>   | AGAAAGCTGGGTGTTGCAAGGAAGAAGGAGAAG   |
| <i>CYP79B2</i>                                | <i>CYP79B2s</i>   | AAAAAGCAGGCTTCGGAATATAAAGTTACTAATT  |
|                                               | <i>CYP79B2a</i>   | AGAAAGCTGGGTGGTTTGTGTATAGAGAAGAAG   |
| <i>AT4G18422</i>                              | <i>AT4G18422s</i> | AAAAAGCAGGCTTCCTAATTCGCTCAGCTTCGTT  |
|                                               | <i>AT4G18422a</i> | AGAAAGCTGGGTGAATTTTTTCTAGGTTAAAAAA  |
| <i>AT1G23200</i>                              | <i>AT1G23200s</i> | AAAAAGCAGGCTTCTATATAGTGA CTCAA ACTG |
|                                               | <i>AT1G23200a</i> | AGAAAGCTGGGTGTTGAGAAGTACCAATAGAGA   |
| <i>AT3G12730</i>                              | AT3G12730s        | AAAAAGCAGGCTTCACGATCTCAACAACCTGCGC  |
|                                               | AT3G12730a        | AGAAAGCTGGGTGTTAACTAACAAAGTACTAAA   |
| <i>NRT1.7</i>                                 | NRT1.7s           | AAAAAGCAGGCTTCATTA AAATGCATATGTTTGA |
|                                               | NRT1.7a           | AGAAAGCTGGGTGCTCTAAGATATTACTACT     |
| <b>Plant transformant (cloned in pB7YWG2)</b> |                   |                                     |
| <i>BZIP9</i>                                  | BZIP9s            | AAAAAGCAGGCTTCATGGATAATCACACAGCTAA  |
|                                               | BZIP9a            | AGAAAGCTGGGTGTGGCCAGATGTCTGAGACGC   |
| <i>CDF4</i>                                   | CDF4s             | AAAAAGCAGGCTTCATGGCGACTCAAGATTCTCA  |
|                                               | CDF4a             | AGAAAGCTGGGTGGCAGATTGACCGTCGGAGT    |
| <i>AT3G12730</i>                              | AT3G12730s        | AAAAAGCAGGCTTCATGATGCAGTCGAGAGAGGA  |
|                                               | AT3G12730a        | AGAAAGCTGGGTGACCGAGACAAACCGTACGGC   |

|                         |            |                                        |
|-------------------------|------------|----------------------------------------|
| <i>NEK6</i>             | NEK6s      | AAAAAGCAGGCTTCATGGAGTCACGAATGGATCA     |
|                         | NEK6a      | AGAAAGCTGGGTGTGAACAATTCCTGGAGCTGC      |
| <i>ARFB1A</i>           | ARFB1As    | AAAAAGCAGGCTTCATGGGAGCCAGATTTTCACG     |
|                         | ARFB1Aa    | AGAAAGCTGGGTGATACCTCGGACCTCGGACCA      |
| <i>ATNPF2.13</i>        | ATNPF2.13s | AAAAAGCAGGCTTCATGGTTTTGGAGGATAGAAA     |
|                         | ATNPF2.13a | AGAAAGCTGGGTGTTTCATCGATTTCTTCGAAG      |
| <i>BZIP25</i>           | BZIP25s    | AAAAAGCAGGCTTCATGCACATCGTCTTCTCTGT     |
|                         | BZIP25a    | AGAAAGCTGGGTGATGCTTGTGATTCCAATGGG      |
| <b>Mutant confirmed</b> |            |                                        |
| SALK_083<br>107         | LP         | GACCACTTCTTCTGCGTAACG                  |
|                         | RP         | AATGGTCCTGACGACATTCTG                  |
| SALK_005<br>252         | LP         | CTGAGAGCAAATGTGCCCTAG                  |
|                         | RP         | ACCTCATCGATACCTCCAACC                  |
| SALK_135<br>351         | LP         | ACTGCAGCACTACATGCATTG                  |
|                         | RP         | TCCATAGCAATGGTCCTAACG                  |
| SALK_024<br>990         | LP         | GTATTTCCGTGATGCTGAAGG                  |
|                         | RP         | CGAATGAATCTGTTTTCTCCG                  |
| SALK_047<br>877         | LP         | TACAAAAGCTAAGAGCGACGC                  |
|                         | RP         | GCAAGTACGATGATCTTTCCG                  |
| SALK_085<br>541         | LP         | AAAATCATGCCGGAAACTACC                  |
|                         | RP         | AATTTGACAACCCTGAAATTC                  |
|                         | LBb1.3     | ATTTTGCCGATTTTCGGAAC                   |
|                         |            | <b>Targets selection</b>               |
| <i>AT5G08670</i>        | Target 1   | TAATTTGGCGGCAGATCTACCGG                |
|                         | Target 2   | AGGTCGCATACTCGGCGACGCGG                |
| <i>AT5G08690</i>        | Target 1   | TAATTTGGCGGCAGATCTACCGG                |
|                         | Target 3   | CTCAAATCTCACATCGACAATGG                |
|                         |            | <b>Primer for intermediate vectors</b> |

|                  |          |                                                |
|------------------|----------|------------------------------------------------|
| <i>AT5G08670</i> | Target 1 | AT5G-Y1(+):cagtGGTCTCatgcataatttggcggcagatctac |
|                  |          | AT5G-Y1(-):cagtGGTCTCaaaacgtagatctgccgcaaatta  |
| <i>AT5G08670</i> | Target 2 | AT5G-B1(+):cagtGGTCTCatgcaaggtcgatactcggcgacg  |
|                  |          | AT5G-B1(-):cagtGGTCTCaaaaccgtcgccgagatgcgacct  |
| <i>AT5G08690</i> | Target 1 | AT5G-Y1(+):cagtGGTCTCatgcataatttggcggcagatctac |
|                  |          | AT5G-Y1(-):cagtGGTCTCaaaacgtagatctgccgcaaatta  |
| <i>AT5G08690</i> | Target 3 | AT5G-A1(+):cagtGGTCTCatgcactcaaattccacatcgacaa |
|                  |          | AT5G-A1(-):cagtGGTCTCaaaacttgcgatgtgagattgag   |
